# Supplementary material for: Stacking orders induced direct band gap in bilayer MoSe2-WSe2 lateral heterostructures
Source: PubMed Central journal article supplement (PMC4985822; doi:10.1038/srep31122), 2016-08-16
Supplement: srep31122-s1.pdf [file srep31122-s1.pdf]

Stacking orders induced direct band gap in bilayer

MoSe<sub>2</sub>-WSe<sub>2</sub> lateral heterostructures

Xiaohui Hu<sup>1</sup>, Liangzhi Kou<sup>2\*</sup> & Litao Sun<sup>1\*</sup>

<sup>1</sup>SEU-FEI Nano-Pico Center, Key Lab of MEMS of Ministry of Education,  
Southeast University, 210096 Nanjing, China

<sup>2</sup>School of Chemistry, Physics and Mechanical Engineering Faculty,  
Queensland University of Technology, Garden Point Campus, Brisbane, QLD  
4001, Australia

\*Correspondence to: L.S. (slt@seu.edu.cn) or L.K. (kouliangzhi@gmail.com)

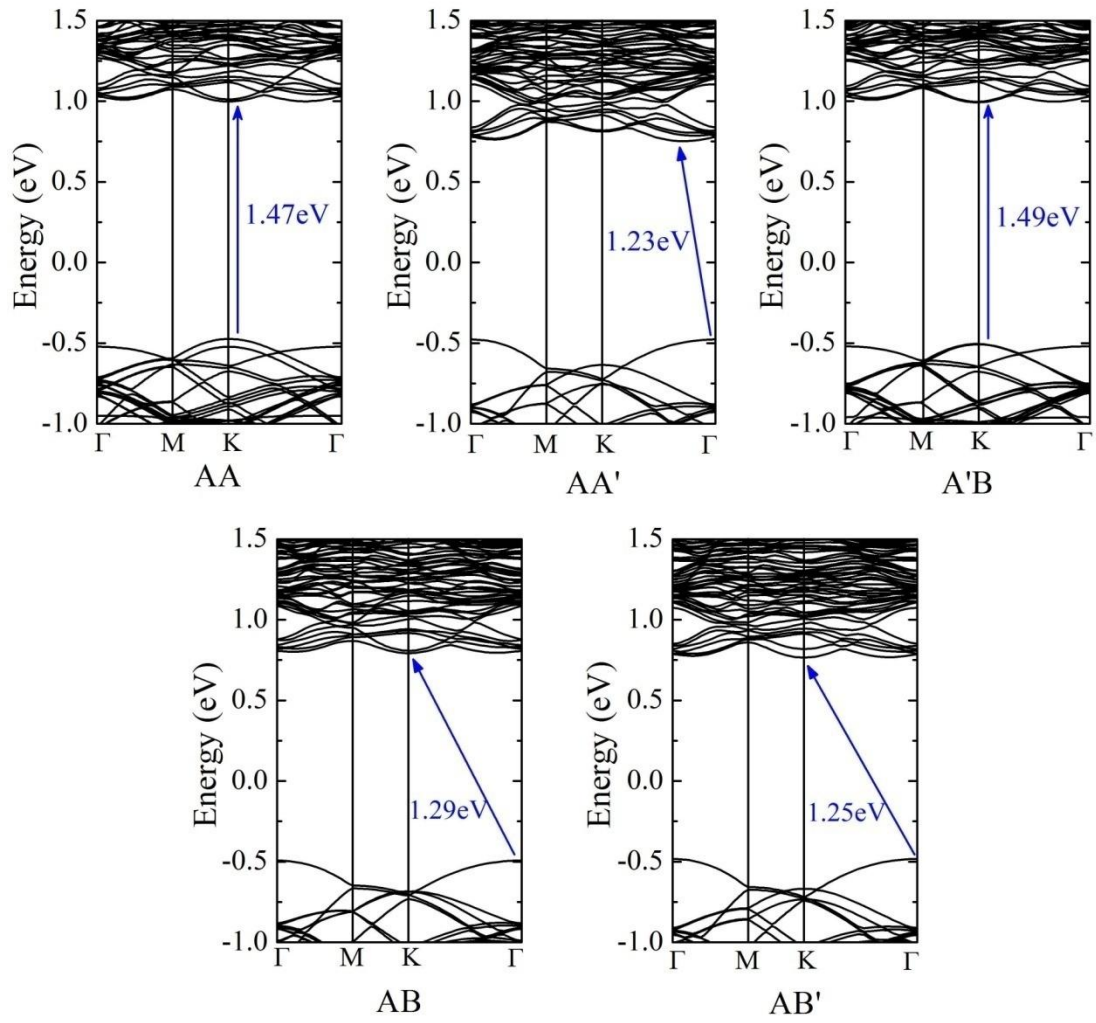

Figure S1 Band structures of AA, AA', A'B, AB, and AB' stacked bilayer

MoSe<sub>2</sub>-WSe<sub>2</sub> lateral heterostructures in the case of B1.

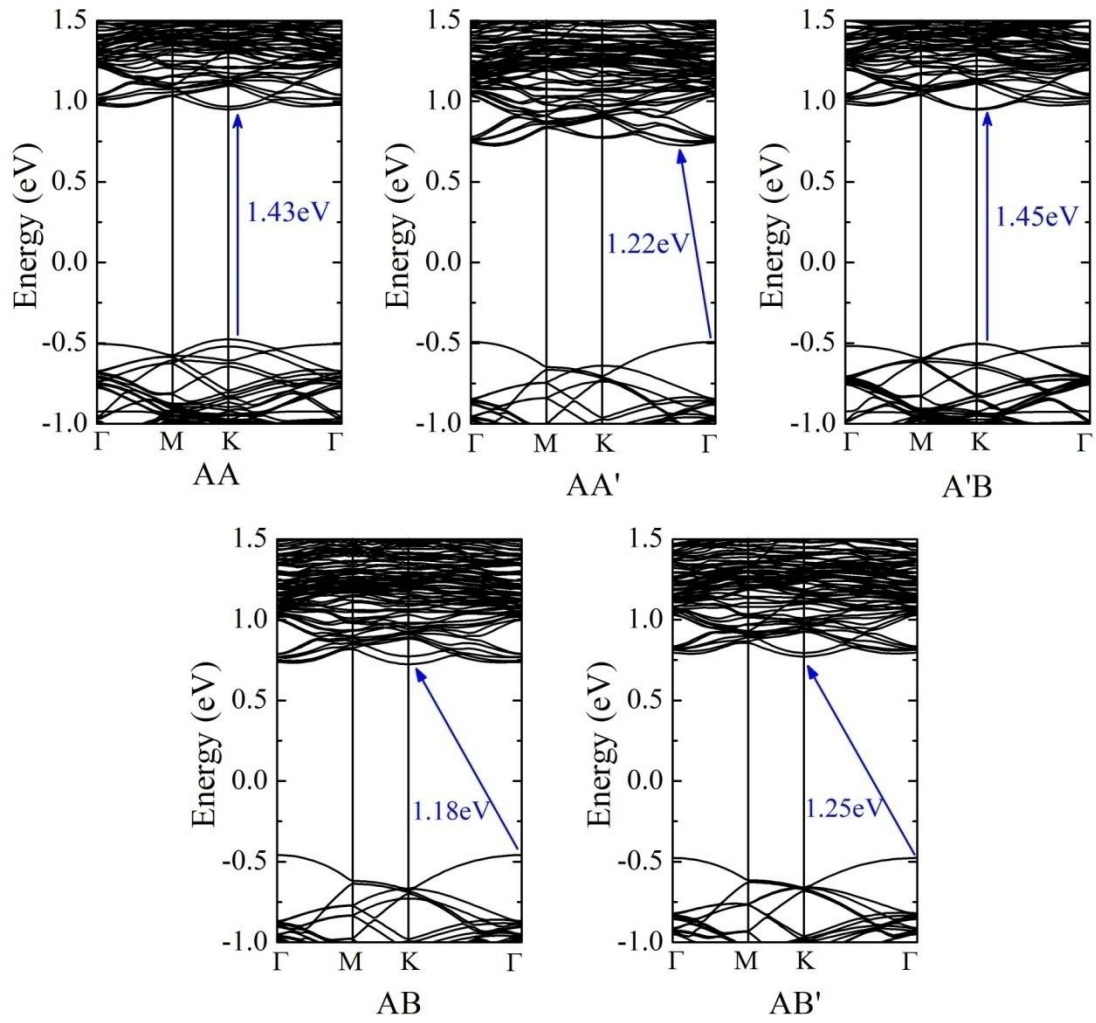

Figure S2 Band structures of AA, AA', A'B, AB, and AB' stacked bilayer

MoSe<sub>2</sub>-WSe<sub>2</sub> lateral heterostructures in the case of B3.
